# Supplementary material
Source: PubMed Central journal article supplement (PMC4340311)
Supplement: supp_M056622_jlr.M056622-1.pdf [file supp_M056622_jlr.M056622-1.pdf]

**Supplemental figure 1. Effect of myriocin on the cellular viability.** LDH release to the culture medium was analyzed. BHK/ABCB4 and BHK/ABCA1 cells were treated without (empty bars) and with 10 nM mifepristone (filled bars) for 16 h and then incubated with 0-80  $\mu$ M myriocin for 24 h. Experiments were performed in triplicate, and the average values are shown with the S.D.

**Supplemental figure 2. Effect of myriocin on ABC protein-independent release of PC and cholesterol from HEK293 cells.** HEK293 cells were pre-treated with 0 or 20  $\mu$ M myriocin for 24 h. Then, cells were incubated in the absence or presence of 1 mM NaTC (A) or 10  $\mu$ g/ml apoA-I (B) for 24 h. Amounts of PC (A) and cholesterol (B) in the medium were measured.

**Supplemental figure 3. Effect of myriocin on the amount of ABCB4 and ABCA1 expressed in HEK293 cells.** HEK293 cells were treated with 0 or 20  $\mu$ M myriocin for 24 h. Cell lysates (10  $\mu$ g of protein) were separated by 7% polyacrylamide gel electrophoresis, and ABCB4 and ABCA1 were analyzed by Western blotting. Vinculin was analyzed as a loading control.

**Supplemental figure 4. Mifepristone-induced ABCB4 and ABCA1 expression in BHK cells.** BHK/ABCB4 (A) and BHK/ABCA1(B) cells were treated with 10 nM mifepristone for 24 h and ABCB4 and ABCA1 were analyzed by Western blotting. Vinculin was analyzed as a loading control.

**Supplemental figure 5. ABCA1-dependent PC (A) and cholesterol (B) efflux to apoA-I from BHK/ABCA1 cells.** BHK/ABCA1 cells were pre-treated with 0 or 10 nM mifepristone for 24 h. Then, cells were incubated with (filled bars) or without (empty bars) 10  $\mu$ g/ml apoA-I in the absence or presence of 40  $\mu$ M myriocin for 16 h. Then PC (A) and cholesterol (B) contents in the medium were measured.

**Supplemental figure 6. Effect of HPA-12 on ABC protein-independent release of PC and cholesterol from BHK/ABCA1 cells.** BHK/ABCA1 cells were pre-treated with 0 or 10  $\mu$ M HPA-12 for 24 h. Then, cells were incubated with 0 or 10  $\mu$ M HPA-12 in the absence or presence of 1 mM NaTC or 10  $\mu$ g/ml apoA-I for 24 h. Cholesterol (A, C) and PC (B, D) in the medium were then measured.

**Supplemental figure 7. Effect of myriocin and HPA-12 on ABCB4 and ABCA1 expression.** BHK/ABCB4 (A) and BHK/ABCA1 (B) cells were incubated with or without 40  $\mu$ M myriocin or 10  $\mu$ M HPA-12 in the presence of 10 nM mifepristone for 24 h. In the case of HPA-12, cells were pretreated with HPA-12 before the addition of mifepristone. Expression of ABCB4 and ABCA1 were then analyzed by Western blotting. Vinculin was analyzed as a loading control. Lower panels show the relative expression of ABCB4 and ABCA1.

**Supplemental figure 8. The extracted ion chromatograms for standards of SM and PC.** Mixture of SM d18:1/16:0 and PC 16:0/18:1 (1 ng each) was subjected to LC-ESI-MS/MS analysis. SM and PC standards were detected by scanning for neutral loss of 74 Da in the negative ion mode.

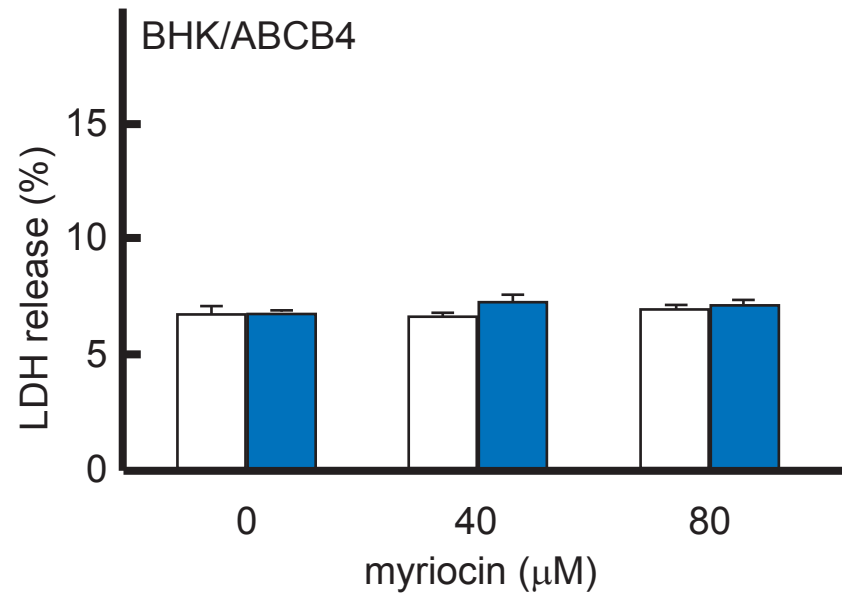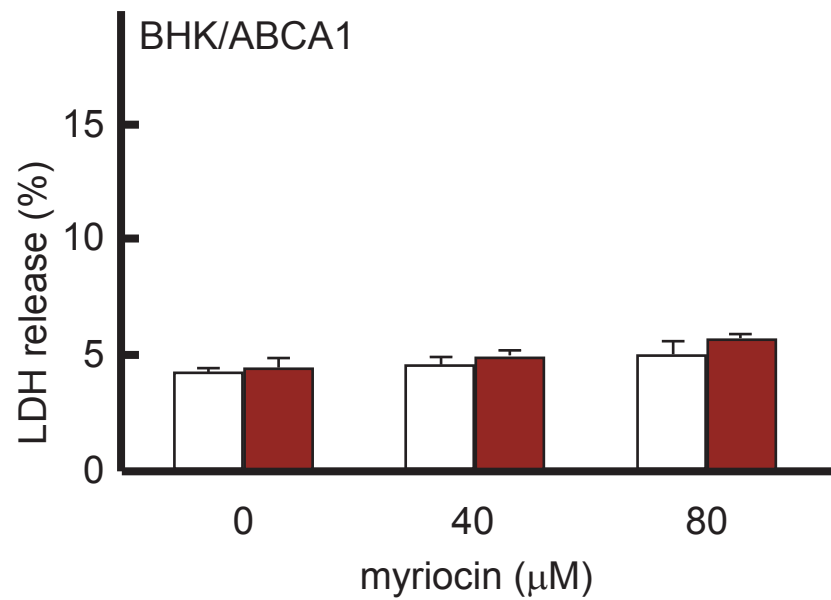

Supplemental figure 1

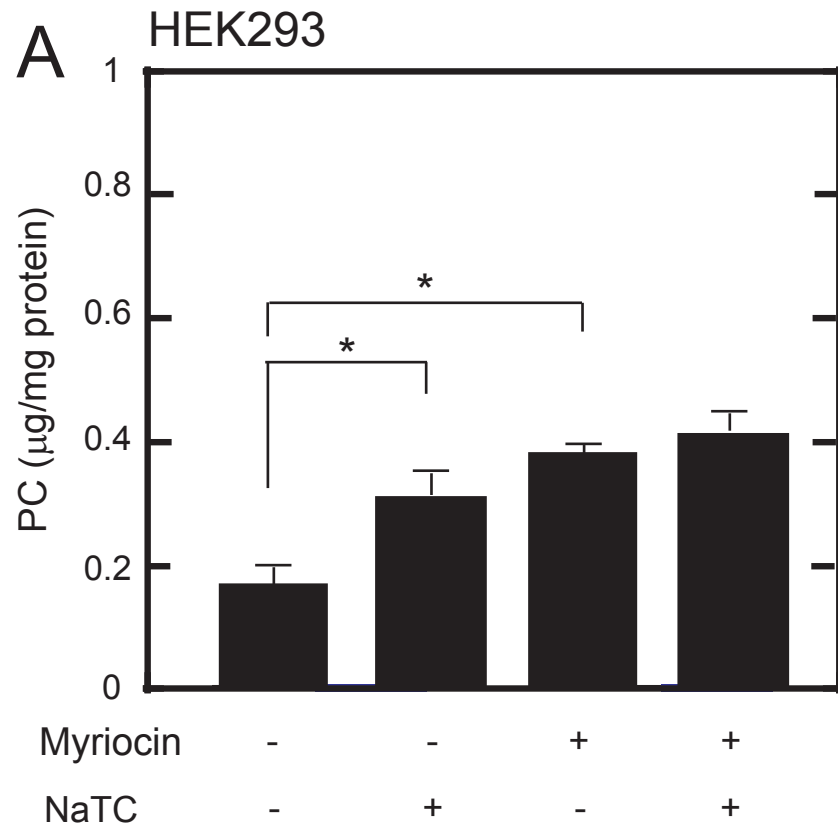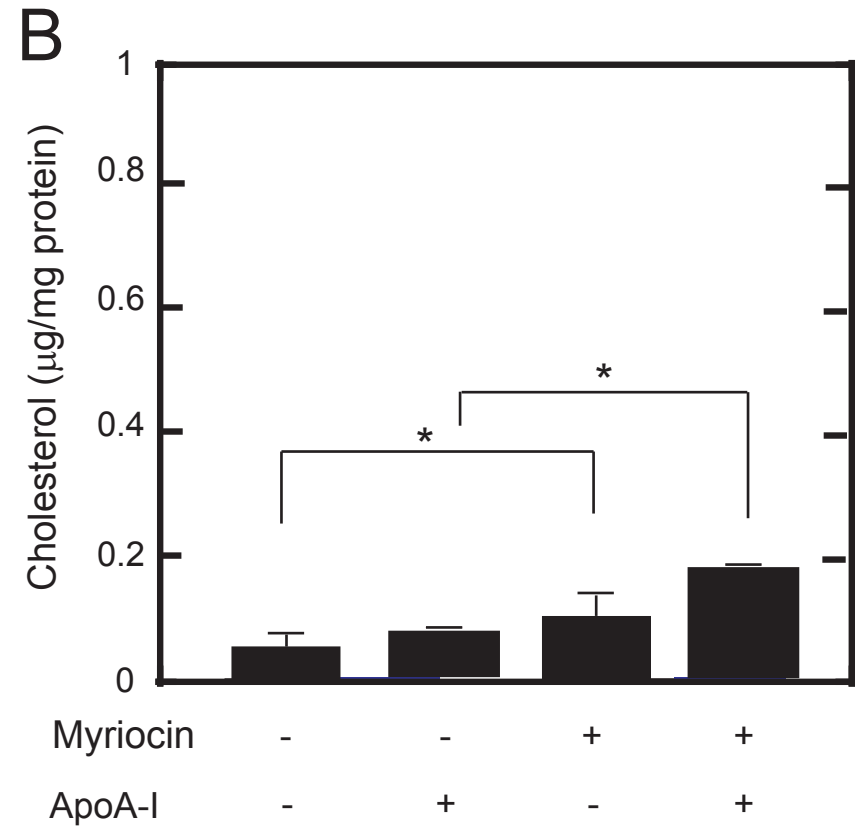

Supplemental figure 2

### A HEK/ABCB4

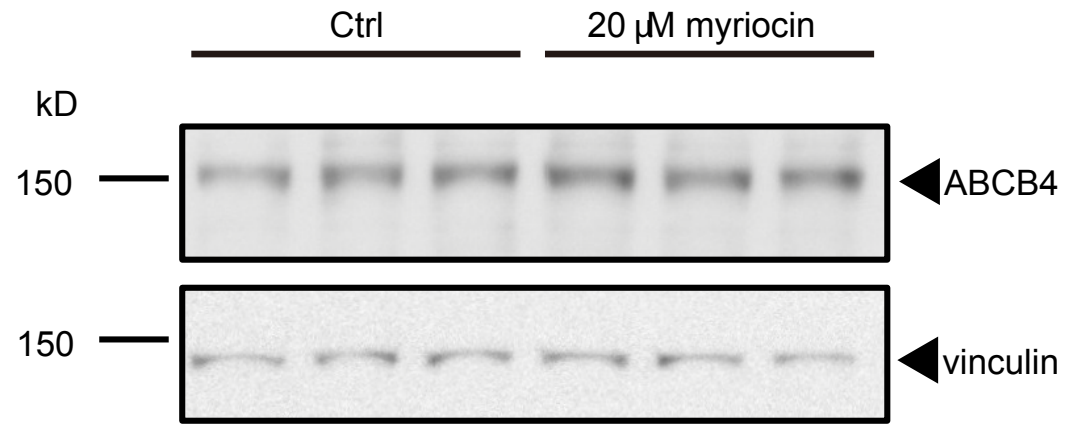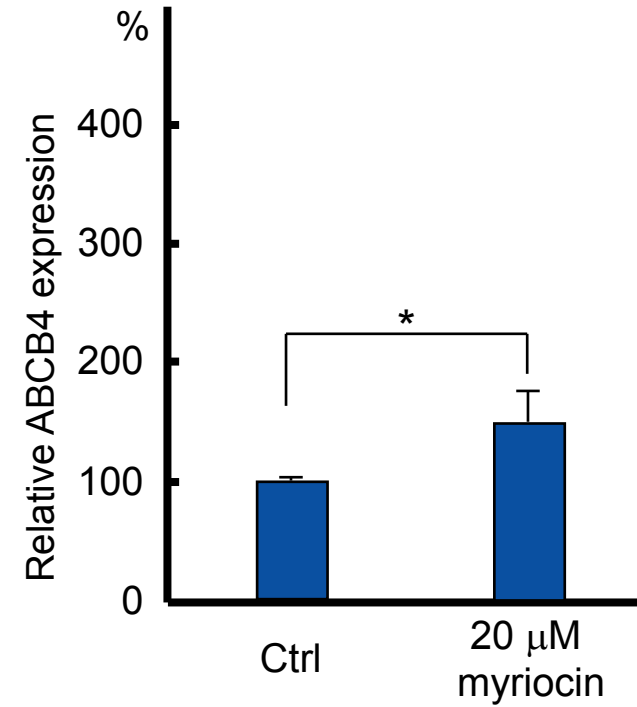

### B HEK/ABCA1

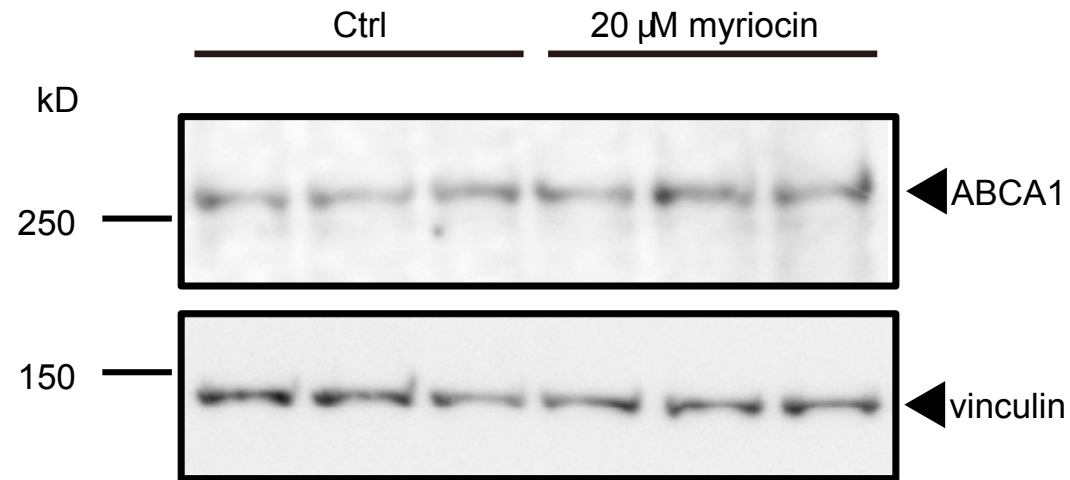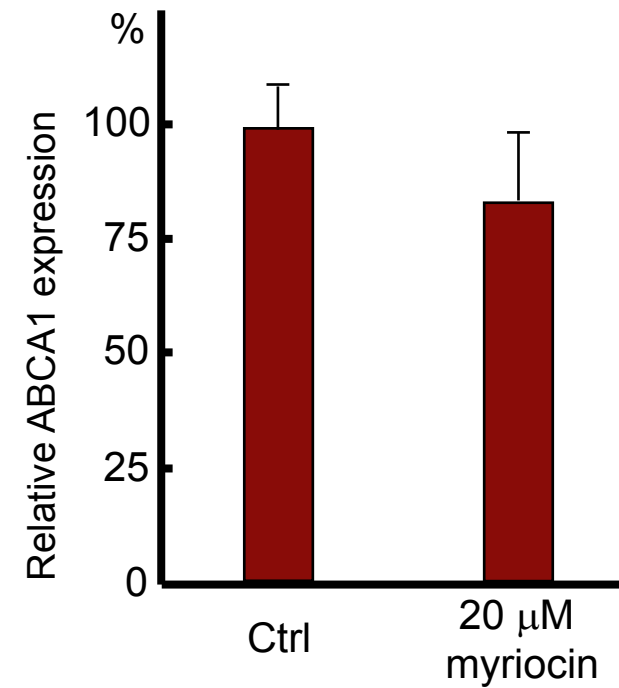

A BHK/ABCB4

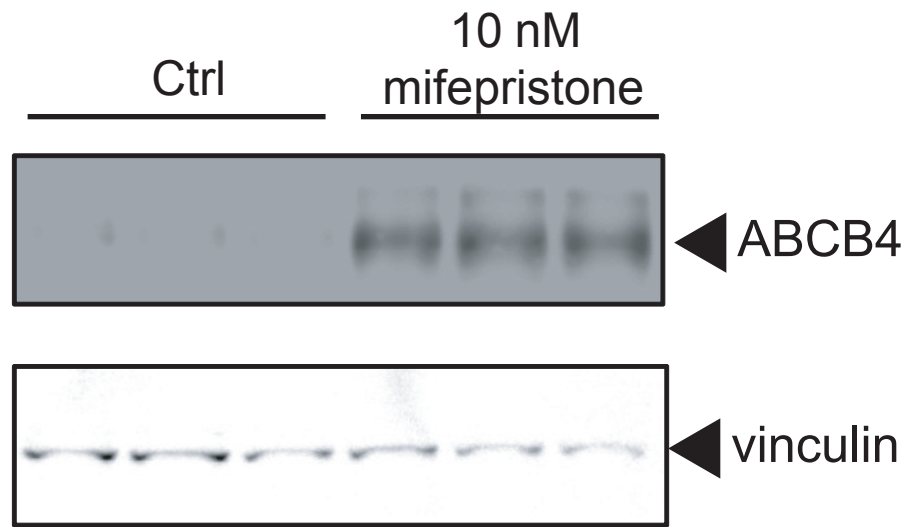

B BHK/ABCA1

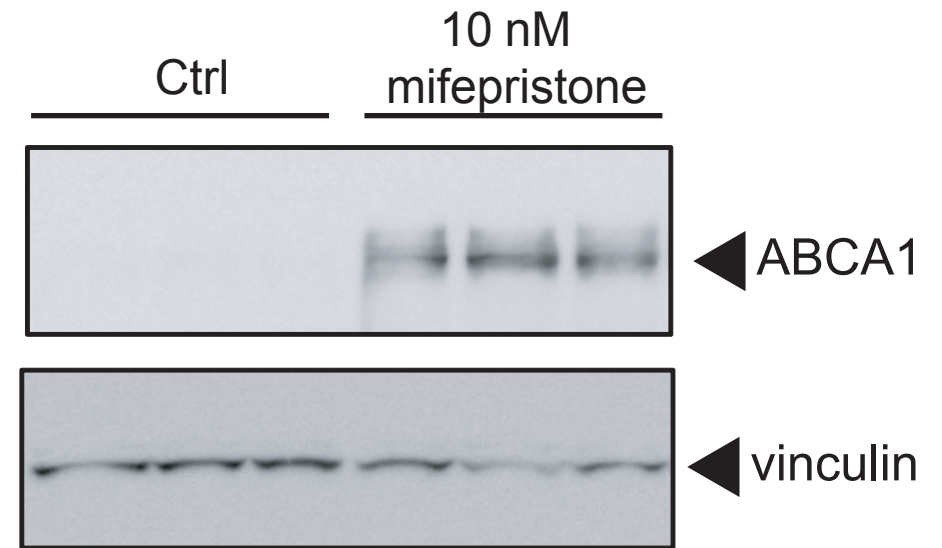

A

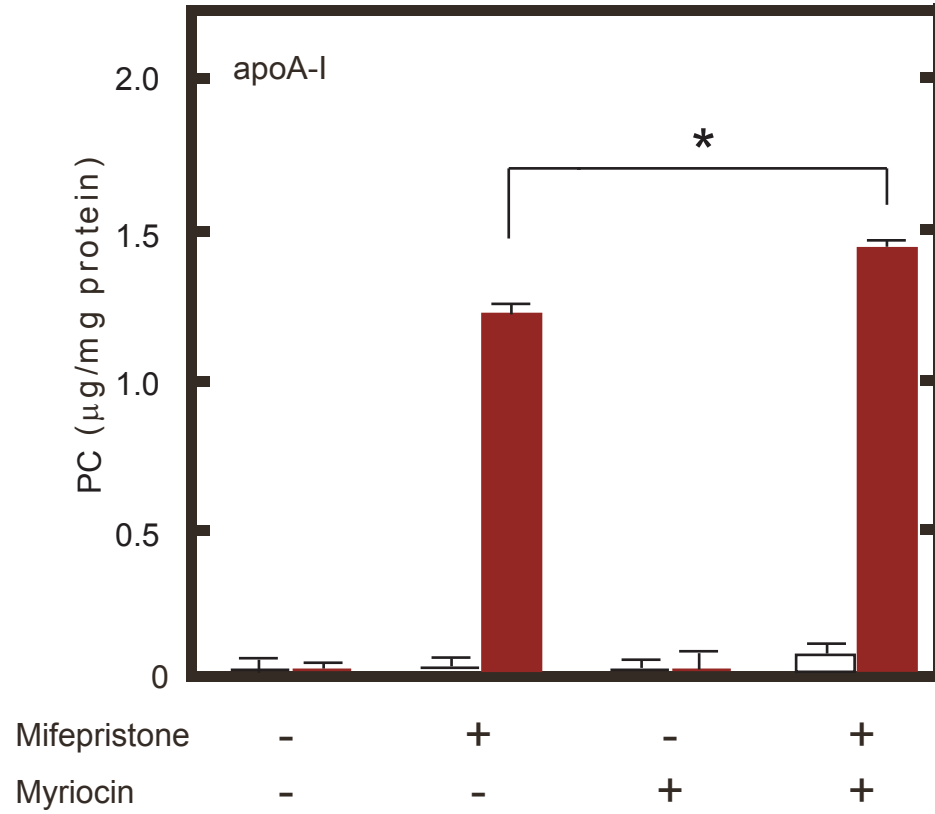

B

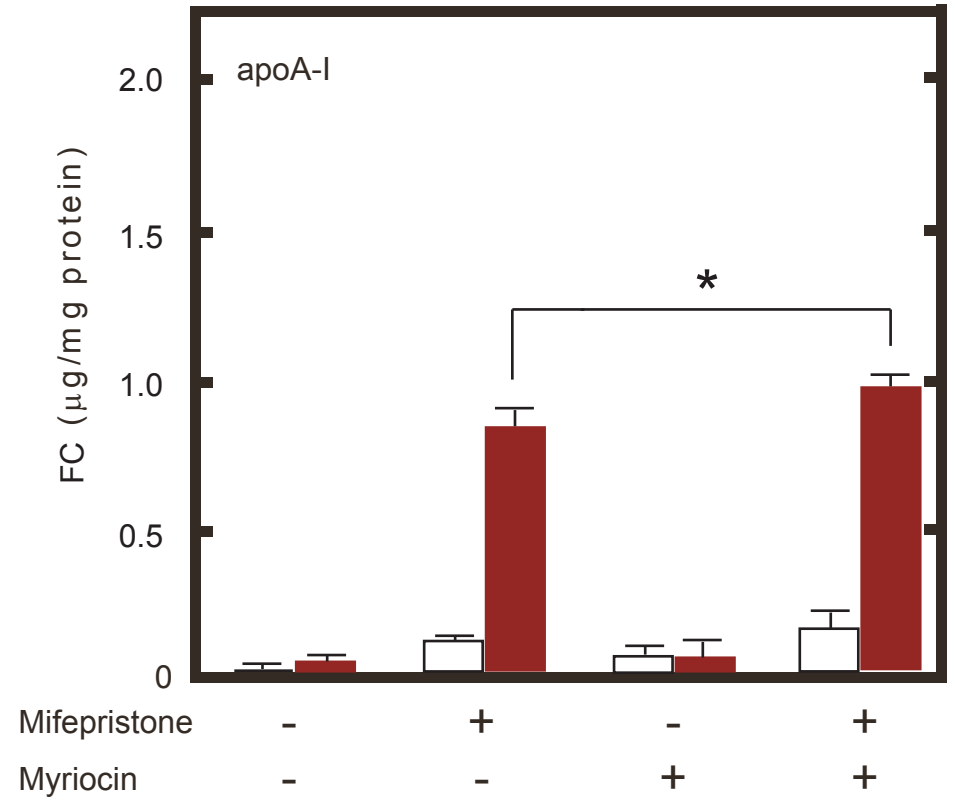

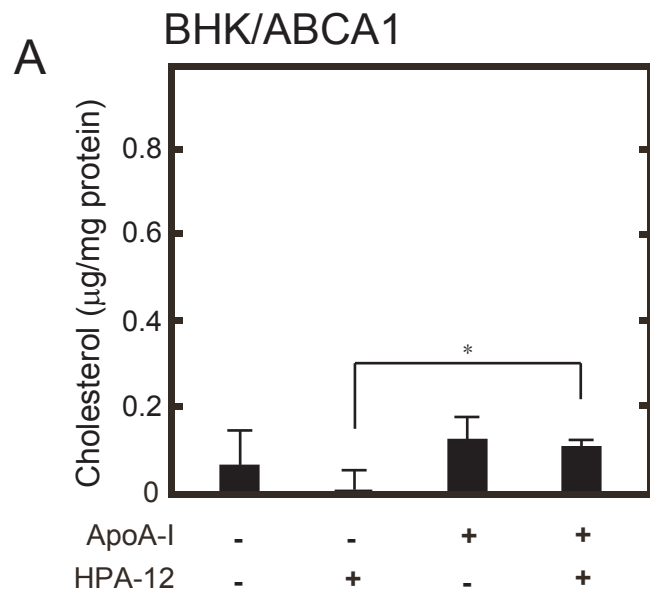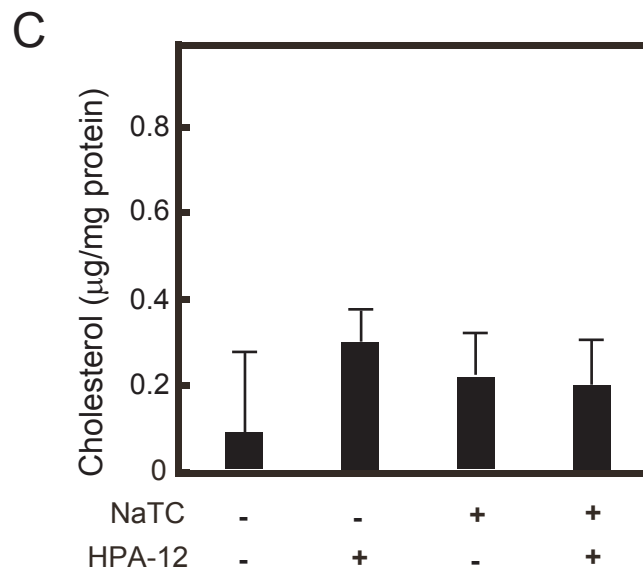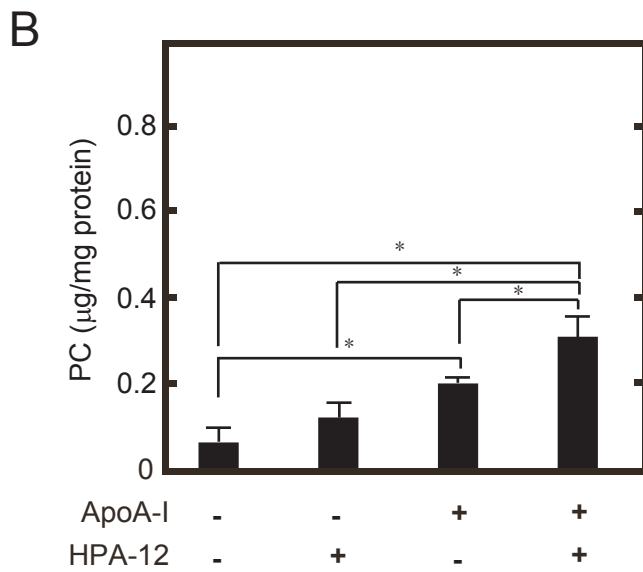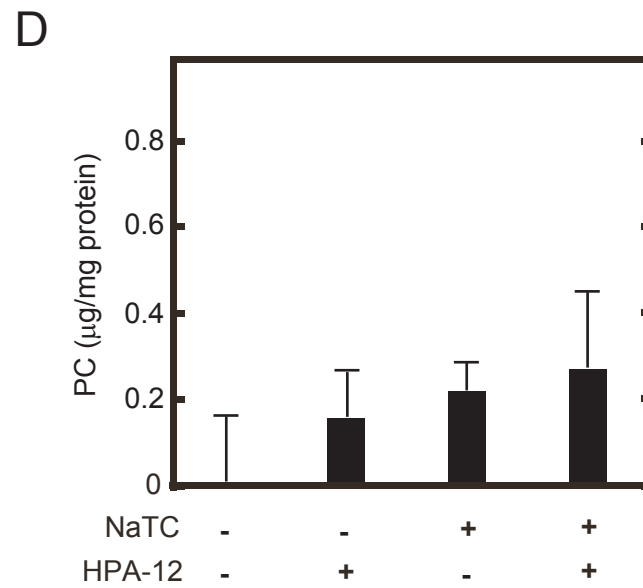

Supplemental figure 6



### A BHK/ABCB4

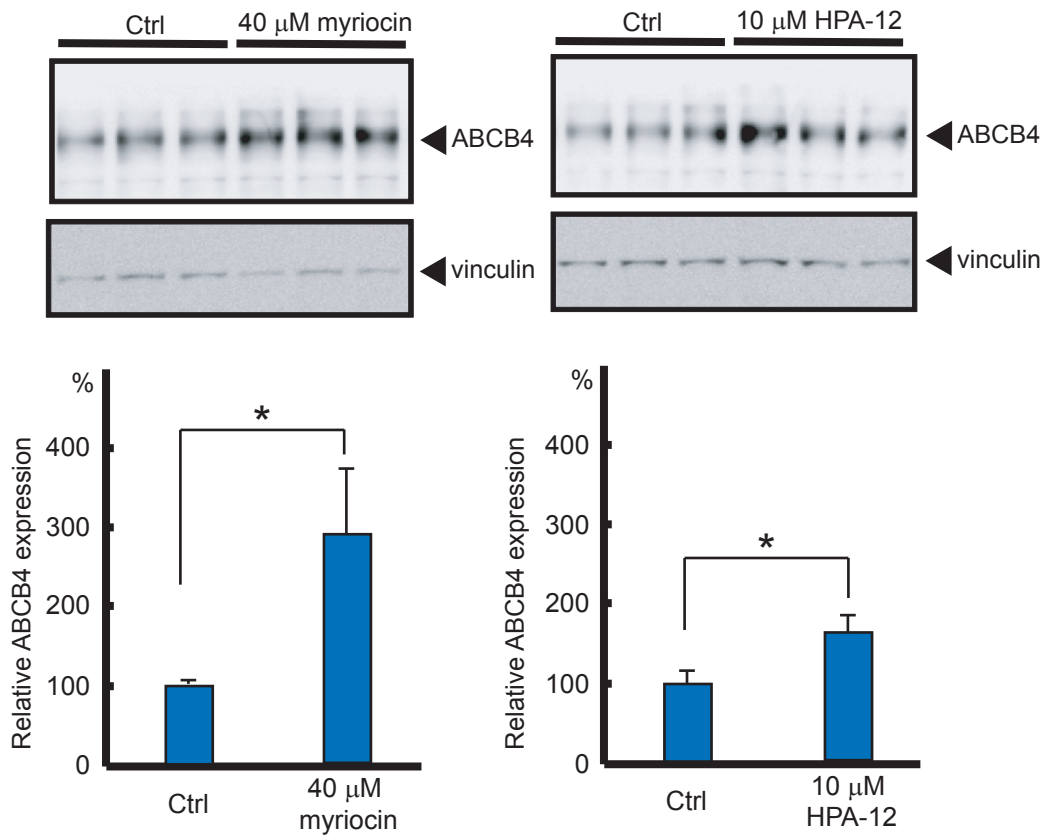

### B BHK/ABCA1

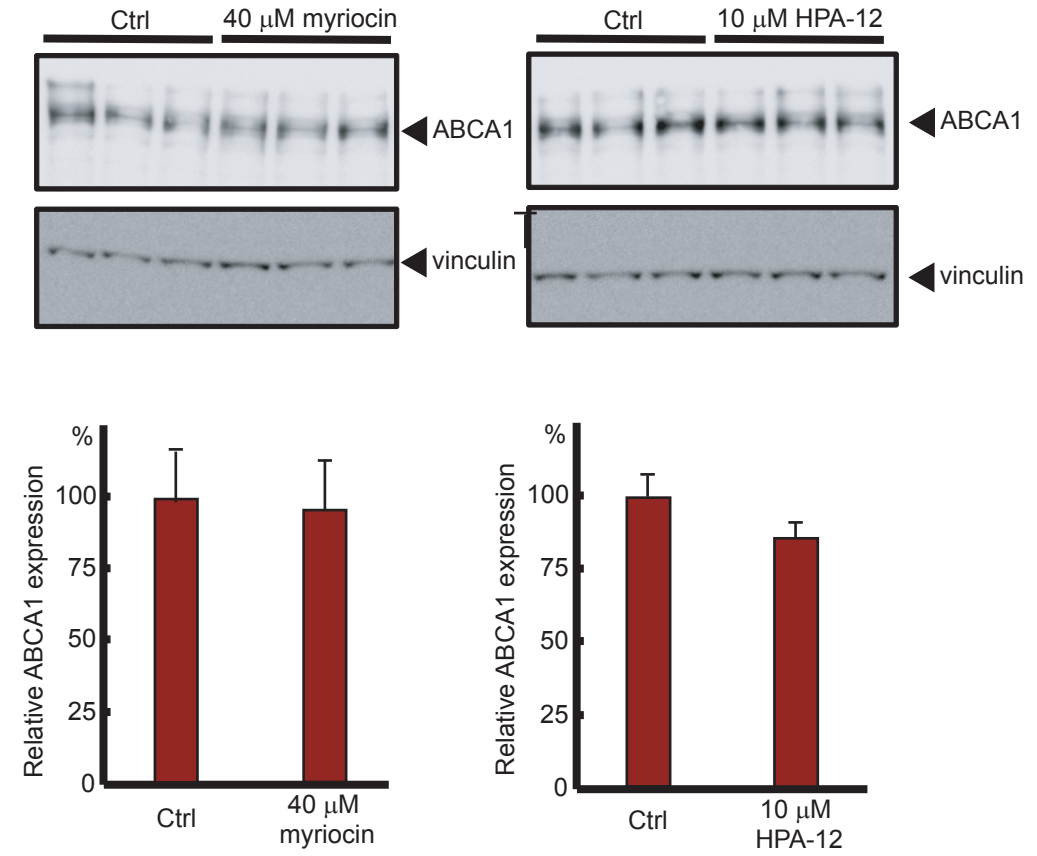

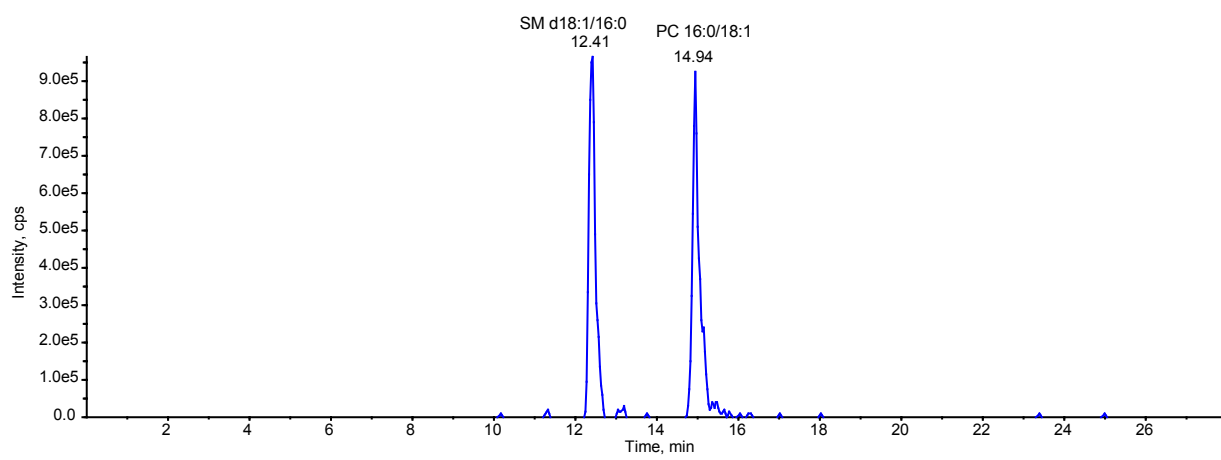

Supplemental figure 8
